# Supplementary material for: Efficient preparation of multimetallic ONO-based Schiff base complexes of nickel(ii) and copper(ii)
Source: Royal Society of Chemistry journal article supplement (doi:10.1039/c6nj00932h), 2016-01-01
Supplement: c6nj00932h1.pdf [file c6nj00932h1.pdf]

## Electronic Supplementary Information

Manuscript ID NJ-ART-03-2016-000932

### Efficient preparation of multimetallic ONO-based Schiff base complexes of nickel(II) and copper(II)

Néstor Novoa, Thierry Roisnel, Vincent Dorcet, Olivier Cadot,  
Carolina Manzur, David Carrillo and Jean-René Hamon

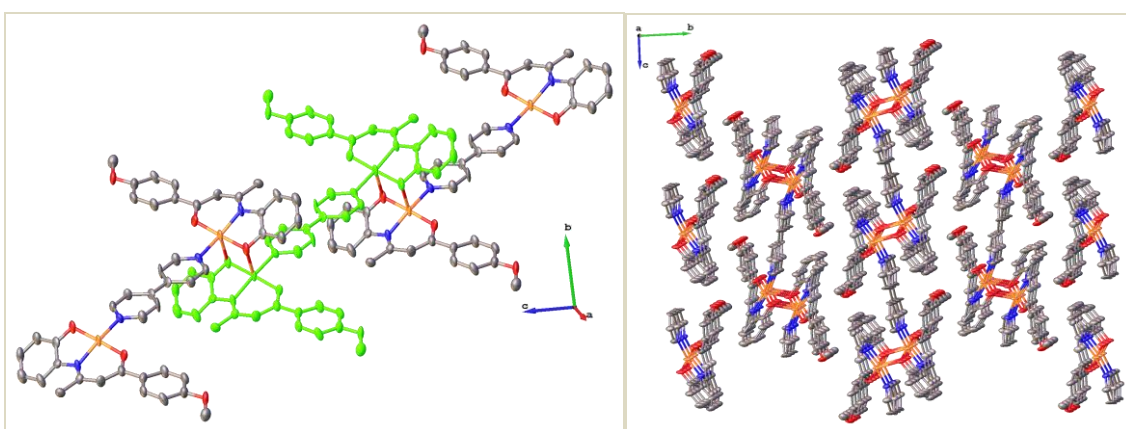

**Fig. S1** Growing packing perspective of complex **3** (top), forming a coordination polymer in the crystal lattice (complex unit in green). Packing view of **3** (bottom) showing a perspective through the “a” axis. Hydrogen atoms are omitted for clarity. Thermal ellipsoids are drawn at 70% probability.

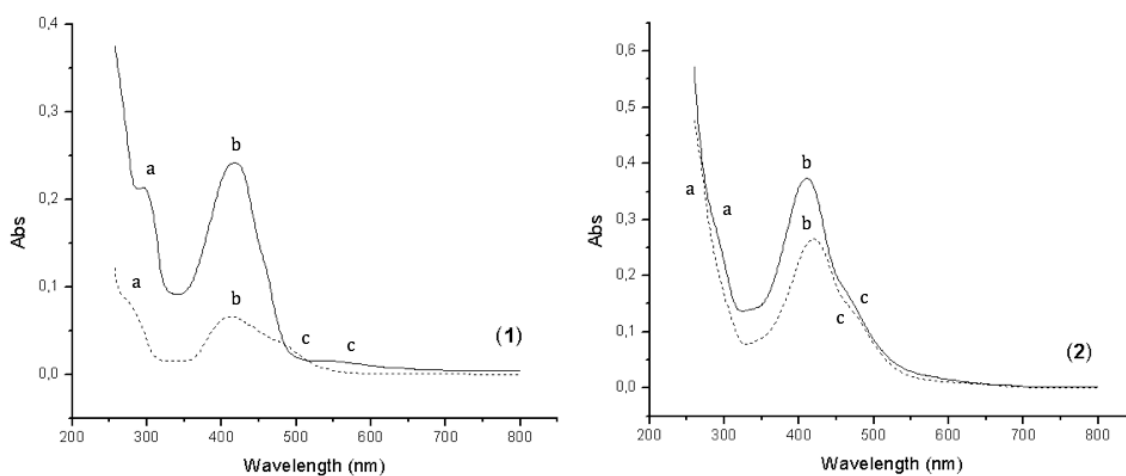

**Fig. S2** Experimental electronic spectra registered at 298 K in CH<sub>2</sub>Cl<sub>2</sub> (full line) and DMSO (dashed line) of (1) (left) and (2) (right).

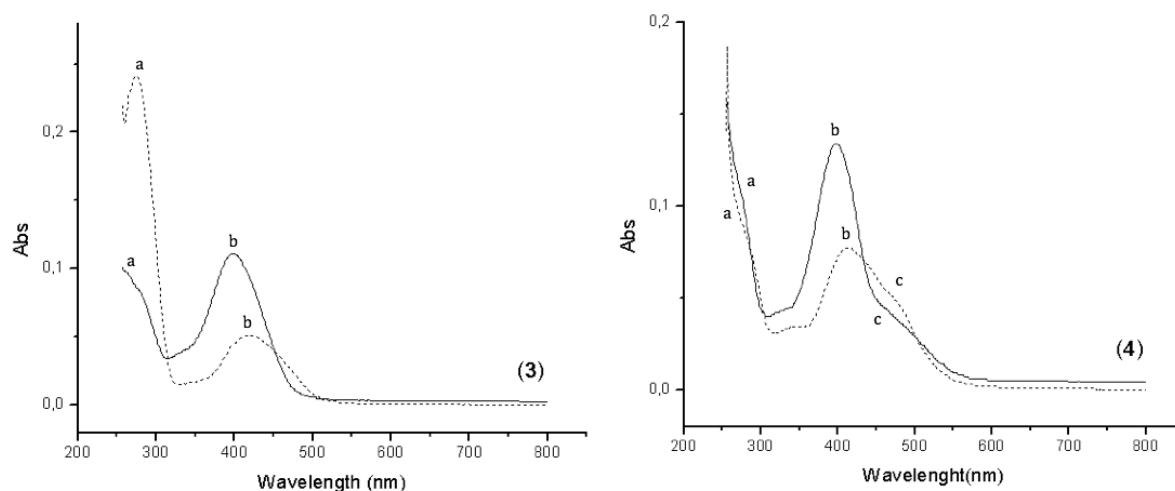

**Fig. S3** Experimental electronic spectra registered at 298 K in CH<sub>2</sub>Cl<sub>2</sub> (full line) and DMSO (dashed line) of (3) (left) and (4) (right).

**Table S1.** Selected bond distances (Å) and angles (°) for compounds **1** and **3**

|                 | <b>1</b>               | <b>3</b>                |
|-----------------|------------------------|-------------------------|
| Bond distances  |                        |                         |
| O(1)-C(1)       | 1.340(5)               | 1.342(8)                |
| C(1)-C(2)       | 1.395(6)               | 1.416(9)                |
| N(1)-C(2)       | 1.432(5)               | 1.428(8)                |
| N(1)-C(7)       | 1.337(5)               | 1.328(8)                |
| C(7)-C(9)       | 1.406(5)               | 1.404(8)                |
| C(9)-C(10)      | 1.369(4)               | 1.401(9)                |
| C(10)-O(2)      | 1.312(5)               | 1.307(8)                |
| N(2)-C(18)      | 1.311(5)               | 1.369(7)                |
| N(2)-C(22)      | 1.328(5)               | 1.342(8)                |
| C(20)-C(20')    | 1.482(8) <sup>#1</sup> | 1.500(12) <sup>#2</sup> |
| Bond angles     |                        |                         |
| M(1)-O(1)-C(1)  | 113.8(3)               | 110.4(4)                |
| M(1)-N(1)-C(2)  | 110.7(3)               | 110.8(4)                |
| M(1)-N(1)-C(7)  | 123.2(3)               | 123.1(4)                |
| M(1)-O(2)-C(10) | 125.4(3)               | 123.0(4)                |
| N(1)-C(7)-C(9)  | 122.3(4)               | 120.6(6)                |
| C(7)-C(9)-C(10) | 127.7(4)               | 128.0(7)                |
| C(9)-C(10)-O(2) | 123.6(4)               | 124.1(6)                |

M = Ni, **1**; Cu, **3**. Symmetry transformations used to generate equivalent atoms: #1 -x+1,-y+2,-z; #2 -x+2,-y,-z+1

**Table S2.** Selected bond distances (Å) and angles (°) for compound **2**

| Bond distances   |          |                   |          |
|------------------|----------|-------------------|----------|
| O(1)-C(1)        | 1.330(4) | O(3)-C(31)        | 1.337(5) |
| C(1)-C(2)        | 1.404(5) | C(31)-C(32)       | 1.409(6) |
| N(1)-C(2)        | 1.432(4) | N(3)-C(32)        | 1.413(5) |
| N(1)-C(7)        | 1.331(5) | N(3)-C(37)        | 1.337(5) |
| C(7)-C(9)        | 1.401(5) | C(37)-C(39)       | 1.414(5) |
| C(9)-C(10)       | 1.378(5) | C(39)-C(40)       | 1.373(5) |
| C(10)-O(2)       | 1.307(4) | C(40)-O(4)        | 1.304(4) |
| N(2)-C(21)       | 1.335(4) | N(4)-C(51)        | 1.359(4) |
| N(2)-C(25)       | 1.351(5) | N(4)-C(55)        | 1.342(5) |
| C(23)-C(53)      | 1.488(5) |                   |          |
| Fe(1)-C(Cp)      | 2.034(4) | Fe(2)-C(Cp)       | 2.043(4) |
| Fe(1)-C(Cp')     | 2.037(4) | Fe(2)-C(Cp')      | 2.041(4) |
| Bond angles      |          |                   |          |
| Ni(1)-O(1)-C(1)  | 112.2(2) | Ni(2)-O(31)-C(32) | 112.0(3) |
| Ni(1)-N(1)-C(2)  | 110.1(2) | Ni(2)-N(3)-C(32)  | 110.5(3) |
| Ni(1)-N(1)-C(7)  | 110.1(2) | Ni(2)-N(3)-C(37)  | 124.6(3) |
| Ni(1)-O(2)-C(10) | 124.6(2) | Ni(2)-O(4)-C(40)  | 125.1(2) |
| N(1)-C(7)-C(9)   | 121.9(4) | N(3)-C(37)-C(39)  | 121.2(4) |
| C(7)-C(9)-C(10)  | 125.8(4) | C(37)-C(39)-C(40) | 125.3(4) |
| C(9)-C(10)-O(2)  | 124.2(4) | C(39)-C(40)-O(4)  | 124.4(3) |

Abbreviations : Cp = C<sub>5</sub>H<sub>5</sub>, Cp' = C<sub>5</sub>H<sub>4</sub>

**TableS3.** Selected bond distances (Å) and angles (°) for compound **5**

| <b>5A</b>                      |            | <b>5B</b>                      |            |
|--------------------------------|------------|--------------------------------|------------|
| Bond distances                 |            |                                |            |
| O(1)-C(1)                      | 1.349(3)   | O(3)-C(21)                     | 1.341(3)   |
| C(1)-C(2)                      | 1.416(3)   | C(21)-C(22)                    | 1.409(3)   |
| N(1)-C(2)                      | 1.420(3)   | N(2)-C(22)                     | 1.423(3)   |
| N(1)-C(7)                      | 1.325(3)   | N(2)-C(27)                     | 1.327(3)   |
| C(7)-C(9)                      | 1.409(3)   | C(27)-C(29)                    | 1.419(3)   |
| C(9)-C(10)                     | 1.384(3)   | C(29)-C(30)                    | 1.390(3)   |
| C(10)-O(2)                     | 1.296(3)   | C(30)-O(4)                     | 1.295(3)   |
| Cu(1)-Cu(1) <sup>#1</sup>      | 3.0369(6)  | Cu(2)-Cu(2) <sup>#2</sup>      | 3.0096(6)  |
| Fe(1)-C(Cp)                    | 2.050(3)   | Fe(2)-C(Cp)                    | 2.042(3)   |
| Fe(1)-C(Cp')                   | 2.047(3)   | Fe(2)-C(Cp')                   | 2.038(2)   |
| Bond angles                    |            |                                |            |
| Cu(1)-O(1)-Cu(1) <sup>#1</sup> | 103.20(7)  | Cu(2)-O(3)-Cu(2) <sup>#2</sup> | 102.43(7)  |
| O(1)-Cu(1)-O(1) <sup>#1</sup>  | 76.90(7)   | O(3)-Cu(2)-O(3) <sup>#2</sup>  | 77.57(7)   |
| Cu(1)-O(1)-C(1)                | 112.57(14) | Cu(2)-O(3)-C(21)               | 113.19(14) |
| Cu(1)-N(1)-C(2)                | 110.82(14) | Cu(2)-N(2)-C(22)               | 111.26(14) |
| Cu(1)-N(1)-C(7)                | 121.10(16) | Cu(2)-N(2)-C(27)               | 120.53(15) |
| Cu(1)-O(2)-C(10)               | 121.70(14) | Cu(2)-O(4)-C(30)               | 122.14(14) |
| N(1)-C(7)-C(9)                 | 122.1(2)   | N(2)-C(27)-C(29)               | 121.8(2)   |
| C(7)-C(9)-C(10)                | 128.4(2)   | C(27)-C(29)-C(30)              | 127.3(2)   |
| C(9)-C(10)-O(2)                | 125.7(2)   | C(29)-C(30)-O(4)               | 125.6(2)   |

Symmetry transformations used to generate equivalent atoms: #1 -x+1,-y+1,-z+1 #2 -x+2,-y,-z+2. Abbreviations : Cp = C<sub>5</sub>H<sub>5</sub>, Cp' = C<sub>5</sub>H<sub>4</sub>

**Table S4.** Metrical parameters of the ferrocenyl units in compounds **2** and **5**

| Compd     | Fe-Cp <sub>CNT</sub> (Å) | Fe-Cp' <sub>CNT</sub> (Å) | Cp <sub>CNT</sub> -Fe-Cp' <sub>CNT</sub> (°) | Cp/Cp' (°)     |
|-----------|--------------------------|---------------------------|----------------------------------------------|----------------|
| <b>2</b>  | 1.652, 1.639             | 1.643, 1.639              | 178.72, 178.62                               | 1.0(3), 1.7(2) |
| <b>5A</b> | 1.658                    | 1.652                     | 179.41                                       | 4.4(2)         |
| <b>5B</b> | <b>1.640</b>             | <b>1.648</b>              | <b>179.53</b>                                | 3.5(2)         |

*Abbreviations:* Cp = C<sub>5</sub>H<sub>5</sub>, Cp' = C<sub>5</sub>H<sub>4</sub>, CNT = centroid.
